# Supplementary material
Source: Springer Nature journal article supplement (https://www.springermedizin.de/resource/supplementary/13195_2012_126_MOESM1_ESM.pdf/9688240)
Supplement: MOESM1 [file 9688240]

**84 Subjects Screened**

**38 Subjects Randomized**

**2 Subjects Never Received Medication**  
1 - Unable to Swallow Pills  
1 - Never Baseline due to Intercurrent Illness

**36 Subjects Baseline,**  
Received at least one dose of Medication

**Placebo - 12 subjects**

**2 gm/day Curcumin - 12 subjects**

**4 gm/day Curcumin - 12 subjects**

**1 subject withdrew:**  
Worsened memory

**3 subjects withdrew:**  
2 due to GI side effects  
1 due to difficulty swallowing pills

**2 subjects withdrew:**  
1 due to GI side effects  
1 due to difficulty swallowing pills

**11 subjects completed week 24 visit**  
CSF available for 10

**9 subjects completed week 24 visit**  
CSF available for 7

**10 subjects completed week 24 visit**  
CSF available for 8
